# Supplementary material for: Energy and techno-economic analysis of bio-based carboxylic acid recovery by adsorption
Source: Royal Society of Chemistry journal article supplement (doi:10.1039/d1gc01002f), 2021-01-01
Supplement: d1gc01002f1.pdf [file d1gc01002f1.pdf]

## Supplemental Information: Energy and techno-economic analysis of bio-based carboxylic acid recovery by adsorption

Patrick O. Saboe<sup>1</sup>, Lorenz P. Manker<sup>1,†</sup>, Hanna R. Monroe<sup>1</sup>, William E. Michener<sup>1</sup>, Stefan Haugen<sup>1</sup>, Eric C. D. Tan<sup>1</sup>, Ryan L. Prestangen<sup>1</sup>, Gregg T. Beckham<sup>1</sup>, and Eric M. Karp<sup>1,\*</sup>

*1. Renewable Resources and Enabling Sciences Center, National Renewable Energy Laboratory, Golden CO, United States*

<sup>†</sup> *Current address: Laboratory of Sustainable and Catalytic Processing (LPDC), Institute of Chemicals Sciences and Engineering (ISIC), School of Basic Sciences (SB), Ecole Polytechnique Fédérale de Lausanne (EPFL), 1015 Lausanne, Switzerland*

\* *Email: [eric.karp@nrel.gov](mailto:eric.karp@nrel.gov)*

**Table S1.** Adsorption studies for carboxylic acid recovery

| Reference                                       | Resin name                    | Resin functionality                   | Acid(s) studied                                       | Elution method                                   |
|-------------------------------------------------|-------------------------------|---------------------------------------|-------------------------------------------------------|--------------------------------------------------|
| Srivastava <i>et al.</i> (1992) <sup>1</sup>    | Amberlite IRA-400             | Quaternary amine                      | Lactic acid                                           | 2.5 M HCl                                        |
| Fu <i>et al.</i> (2002) <sup>2</sup>            | Amberlite IRA-400             | Quaternary amine                      | Fumaric acid                                          | n/a                                              |
| Cao <i>et al.</i> (2002) <sup>3</sup>           | Amberlite IRA-400             | Quaternary amine                      | Lactic acid                                           | 1.0 M H <sub>2</sub> SO <sub>4</sub>             |
| Sosa <i>et al.</i> (2001) <sup>4</sup>          | Amberlite IRA-400             | Quaternary amine                      | Lactic acid                                           | 4 M HCl                                          |
| González-Vara <i>et al.</i> (2000) <sup>5</sup> | Amberlite IRA-420             | Strong anion exchanger                | Lactic acid                                           | 5% ammonium carbonate                            |
| Magalhães Jr. <i>et al.</i> (2015) <sup>6</sup> | A-500P, PFA-300               | Strong anion exchanger                | Itaconic acid                                         | 2 M HCl                                          |
| Monteagudo & Aldavero (1999) <sup>7</sup>       | Amberlite IRA-420             | Strong anion exchange                 | Lactic acid                                           | Ammonium carbonate                               |
| Leite <i>et al.</i> (2008) <sup>8</sup>         | Dowex Marathon A              | Quaternary amine                      | Acetic, propionic, butyric acid                       | pH 12 NaOH                                       |
| Cao <i>et al.</i> (1996) <sup>9</sup>           | Amberlite IRA-900             | Quaternary amine                      | Fumaric acid                                          | 0.4 M NaCl                                       |
| Zhang & Yang (2015) <sup>10</sup>               | Amberlite IRA-900             | Quaternary amine                      | Fumaric acid                                          | 0.7 M NaCl, 0.7 M NaOH                           |
| López-Garzón <i>et al.</i> (2015) <sup>11</sup> | Dowex marathon MSA            | Quaternary amine                      | 2,5-furandicarboxylic acid, succinic acid             | Reaction with dimethyl carbonate                 |
| López-Garzón <i>et al.</i> (2012) <sup>12</sup> | Dowex marathon MSA            | Quaternary amine                      | Succinic acid                                         | Reaction with chloroethane                       |
| Dethe <i>et al.</i> (2006) <sup>13</sup>        | Indion 850                    | Quaternary and tertiary amine         | Lactic acid                                           | n/a                                              |
| Bayazit <i>et al.</i> (2009) <sup>14</sup>      | Amberlite IRA-67              | Tertiary amine                        | Glutaric acid, glyoxylic acid                         | n/a                                              |
| Garcia & King (1989) <sup>15</sup>              | Dowex MWA-1                   | Tertiary amine                        | Acetic acid                                           | Methanol                                         |
| Dai & King (1996) <sup>16</sup>                 | Dowex MWA-1, Amberlite IRA-35 | Tertiary amine                        | Lactic acid                                           | n/a                                              |
| Husson & King (1998) <sup>17</sup>              | Dowex MWA-1, Amberlite IRA-35 | Tertiary amine                        | Lactic acid, succinic acid                            | 10 wt % trimethylamine in methyl isobutyl ketone |
| Gao <i>et al.</i> (2010) <sup>18</sup>          | IRA-67                        | Tertiary amine                        | Lactic acid                                           | 4 wt % NaOH                                      |
| Jun <i>et al.</i> (2007) <sup>19</sup>          | mesoporous silica SBA-15      | Primary, secondary and tertiary amine | pyruvic acid, succinic acid                           | n/a                                              |
| Kawabata <i>et al.</i> (1981) <sup>20</sup>     | IRA-400                       | Primary, secondary and tertiary amine | n/a                                                   | Methanol, acetone, 2-propanol                    |
| Chen & Ju (2002) <sup>21</sup>                  | Polyvinylpyridine (PVP)       | Pyridine                              | Lactic acid                                           | 0.1 M NaOH                                       |
| Kawabata <i>et al.</i> (1981) <sup>20</sup>     | Polyvinylpyridine (PVP)       | Pyridine                              | Formic, acetic, propionic, butyric, valeric, acrylic, | Methanol, acetone, 2-propanol                    |

|                                           |                              |               |                                                                                                              |                                                    |
|-------------------------------------------|------------------------------|---------------|--------------------------------------------------------------------------------------------------------------|----------------------------------------------------|
| Chanda et al. (1985) <sup>22</sup>        | Polyvinylpyridine (PVP)      | Pyridine      | methacrylic, lactic, glycolic, adipic, malic, maleic, citric acid<br>Formic, acetic, propionic, butyric acid | 0.1 M NaOH                                         |
| Van den Bergh et al. (2017) <sup>23</sup> | Polyvinylpyridine (PVP)      | Pyridine      | Citric acid                                                                                                  | Acetone, propanol, acetonitrile, ethanol, methanol |
| Garcia & King (1989) <sup>15</sup>        | Polyvinylpyridine (PVP)      | Pyridine      | Acetic acid                                                                                                  | Methanol                                           |
| Dai & King (1996) <sup>16</sup>           | Reillex 425                  | Pyridine      | Lactic acid                                                                                                  | n/a                                                |
| Husson & King (1998) <sup>17</sup>        | Reillex 425                  | Pyridine      | Lactic acid, succinic acid                                                                                   | 10 wt % trimethylamine in methyl isobutyl ketone   |
| Wu et al. (2009) <sup>24</sup>            | Polyvinylpyridine (PVP)      | Pyridine      | Citric acid                                                                                                  | 90°C water                                         |
| Delgado et al. (2018) <sup>25</sup>       | Polyvinylpyridine (PVP)      | Pyridine      | Lactic acid                                                                                                  | Methanol                                           |
| Chanda et al. (1985) <sup>22</sup>        | Polybenzimidazole (PBI)      | benzimidazole | Formic, acetic, propionic, butyric acid                                                                      | 0.1 M NaOH                                         |
| Garcia & King (1989) <sup>15</sup>        | Polybenzimidazole (PBI)      | benzimidazole | Acetic acid                                                                                                  | Methanol                                           |
| Chen & Ju (2002) <sup>21</sup>            | Activated carbon             | n/a           | Lactic acid                                                                                                  | 0.1 M NaOH                                         |
| Gao et al. (2010) <sup>18</sup>           | Activated carbon             | n/a           | Lactic acid                                                                                                  | 4 wt % NaOH                                        |
| Efe et al. (2010) <sup>26</sup>           | CVB28014 (high-silica ZSM-5) | n/a           | Succinic acid                                                                                                | n/a                                                |

**Table S2. Composition of Cyanex 923<sup>27</sup>**

| Component                   | wt%  |
|-----------------------------|------|
| triethylphosphine oxide     | 8.5  |
| octyldiethylphosphine oxide | 30.4 |
| diethylhexylphosphine oxide | 37.4 |
| trioctylphosphine oxide     | 16.1 |
| branched alkyl groups       | 7.3  |

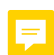

**Table S3.  $\beta$ -values for Common Solvents**

| Solvent            | $\Delta\tilde{\nu}(OH - OMe)$ | $\beta(OH)$ |
|--------------------|-------------------------------|-------------|
| water              | 910                           | 0.448       |
| acetone            | 1010                          | 0.498       |
| methanol           | 1440                          | 0.709       |
| dimethyl sulfoxide | 1500                          | 0.739       |

Kamlet and Taft developed a solvatochromic scale for determining a solvent's hydrogen bond acceptor strength by measuring the hydrogen bond shifts of two reference probes, 4-nitrophenol and 4-nitroaniline, in the solvent of interest.<sup>28</sup> The two reference probes are identical except in that the hydroxyl group in 4-nitrophenol is replaced with a non-hydrogen bonding methoxy group in 4-nitroaniline. By subtracting the hydrogen bond shift of 4-nitroaniline ( $\Delta\tilde{\nu}(OMe)$ ) from that of 4-nitrophenol ( $\Delta\tilde{\nu}(OH)$ ), one can determine the  $\Delta\tilde{\nu}$  shift that is attributable solely to hydrogen bonding ( $\Delta\tilde{\nu}(OH - OMe)$ ), and not to other intermolecular forces, such as Van der Waals'. The  $\Delta\tilde{\nu}(OMe)$  values can then be scaled to a range of 0-1 by normalizing to the  $\Delta\tilde{\nu}(OH - OMe)$  of hexamethylphosphoric triamide (HMPA) as seen in the equation S1 below:

$$\beta(OH) = \frac{\Delta\tilde{\nu}(OH - OMe)}{2030} \quad S1$$

The  $\Delta\tilde{\nu}(OH - OMe)$  values for the solvents used in this work were taken from tables in Gal and Laurence's *Lewis Basicity and Affinity Scales*.<sup>29</sup> The  $\beta(OH)$  values were then calculated using equation S1 above. The  $\beta(OH)$  value for triethylamine was used as the estimated value for Cyanex 923 because the  $\beta(OH)$  for trihexyl and tri-octyl phosphine oxides are not known and triethylamine has similar donor number (an alternative basicity scale) as tri-octyl phosphine oxide.

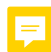

**Table S4. Stream Table for 90.57 g per L Butyric Acid with Acetone and 5 wt% Water**

|                            | Stream 1 | Stream 2 | Stream 3 | Stream 4 | Stream 5 | Stream 6 | Stream 7 | Stream 8 | Stream 9 |
|----------------------------|----------|----------|----------|----------|----------|----------|----------|----------|----------|
| Temperature (°C)           | 20.0     | 20.0     | 20.0     | 20.7     | 27.1     | 82.7     | 63.8     | 58.0     | 20.8     |
| Pressure (atm)             | 0.16     | 0.16     | 0.16     | 0.16     | 0.10     | 0.10     | 0.25     | 0.25     | 0.25     |
| Total Mass Flow (kg/hr)    | 8.980    | 6.088    | 2.892    | 2.892    | 1.912    | 0.980    | 8.000    | 8.000    | 7.355    |
| Mass Fraction Butyric Acid | 0.111    | 0.002    | 0.342    | 0.342    | 0.010    | 0.991    | 0.004    | 0.004    | 0.000    |
| Mass Fraction Acetone      | 0.839    | 0.968    | 0.566    | 0.566    | 0.856    | 0.001    | 0.941    | 0.941    | 0.991    |
| Mass Fraction Water        | 0.050    | 0.031    | 0.091    | 0.091    | 0.134    | 0.008    | 0.055    | 0.055    | 0.009    |

|                         | Stream 9 | Stream 10 | Stream 11 | Stream 12 | Stream 13 | Stream 14 | Stream 15 | Stream 16 | Stream 17 |
|-------------------------|----------|-----------|-----------|-----------|-----------|-----------|-----------|-----------|-----------|
| Temperature (°C)        | 20.8     | 31.4      | 20.9      | 31.4      | 31.4      | 48.0      | 31.4      | 30.7      | 30.8      |
| Pressure (atm)          | 0.25     | 0.25      | 1.00      | 0.25      | 0.25      | 0.25      | 1.00      | 0.10      | 1.00      |
| Total Mass Flow (kg/hr) | 7.355    | 0.807     | 7.355     | 0.645     | 0.161     | 0.161     | 0.645     | 0.980     | 0.980     |

|                                   |       |       |       |       |       |       |       |       |       |
|-----------------------------------|-------|-------|-------|-------|-------|-------|-------|-------|-------|
| <b>Mass Fraction Butyric Acid</b> | 0.000 | 0.045 | 0.000 | 0.045 | 0.045 | 0.045 | 0.045 | 0.991 | 0.991 |
| <b>Mass Fraction Acetone</b>      | 0.991 | 0.370 | 0.991 | 0.370 | 0.370 | 0.370 | 0.370 | 0.001 | 0.001 |
| <b>Mass Fraction Water</b>        | 0.009 | 0.585 | 0.009 | 0.585 | 0.585 | 0.585 | 0.585 | 0.008 | 0.008 |

**Table S5. Stream Table for 90.57 g per L Butyric Acid with 10 wt% TOA-acetone and 5 wt.% Water**

|                                   | <b>Stream 1</b> | <b>Stream 2</b> | <b>Stream 3</b> | <b>Stream 4</b> | <b>Stream 5</b> | <b>Stream 6</b> | <b>Stream 7</b> | <b>Stream 8</b> | <b>Stream 9</b> |
|-----------------------------------|-----------------|-----------------|-----------------|-----------------|-----------------|-----------------|-----------------|-----------------|-----------------|
| <b>Temperature (°C)</b>           | 20.0            | 20.0            | 20.0            | 31.4            | 79.6            | 268.9           | 67.3            | 20.7            | 73.2            |
| <b>Pressure (atm)</b>             | 0.10            | 0.10            | 0.10            | 0.10            | 0.10            | 0.10            | 0.06            | 0.06            | 0.06            |
| <b>Total Mass Flow (kg/hr)</b>    | 8.972           | 6.406           | 2.566           | 2.566           | 1.796           | 0.769           | 1.796           | 0.829           | 0.968           |
| <b>Mass Fraction Butyric Acid</b> | 0.111           | 0.005           | 0.378           | 0.378           | 0.540           | 0.000           | 0.540           | 0.014           | 0.990           |
| <b>Mass Fraction TOA</b>          | 0.086           | 0.000           | 0.300           | 0.300           | 0.000           | 1.000           | 0.000           | 0.000           | 0.000           |
| <b>Mass Fraction Acetone</b>      | 0.747           | 0.941           | 0.262           | 0.262           | 0.374           | 0.000           | 0.374           | 0.802           | 0.007           |
| <b>Mass Fraction Water</b>        | 0.056           | 0.054           | 0.060           | 0.060           | 0.086           | 0.000           | 0.086           | 0.183           | 0.003           |

  

|                                   | <b>Stream 10</b> | <b>Stream 11</b> | <b>Stream 12</b> | <b>Stream 13</b> | <b>Stream 14</b> | <b>Stream 15</b> | <b>Stream 16</b> | <b>Stream 17</b> | <b>Stream 18</b> |
|-----------------------------------|------------------|------------------|------------------|------------------|------------------|------------------|------------------|------------------|------------------|
| <b>Temperature (°C)</b>           | 91.3             | 85.0             | 20.7             | 32.1             | 32.1             | 32.1             | 75.0             | 20.8             | 32.2             |
| <b>Pressure (atm)</b>             | 0.25             | 0.25             | 0.25             | 0.25             | 0.25             | 0.25             | 0.25             | 1.00             | 1.00             |
| <b>Total Mass Flow (kg/hr)</b>    | 7.235            | 7.235            | 6.475            | 0.800            | 0.040            | 0.760            | 0.040            | 6.475            | 0.760            |
| <b>Mass Fraction Butyric Acid</b> | 0.006            | 0.006            | 0.000            | 0.055            | 0.055            | 0.055            | 0.055            | 0.000            | 0.055            |

|                              |       |       |       |       |       |       |       |       |       |
|------------------------------|-------|-------|-------|-------|-------|-------|-------|-------|-------|
| <b>Mass Fraction TOA</b>     | 0.000 | 0.000 | 0.000 | 0.000 | 0.000 | 0.000 | 0.000 | 0.000 | 0.000 |
| <b>Mass Fraction Acetone</b> | 0.926 | 0.926 | 0.993 | 0.348 | 0.348 | 0.348 | 0.348 | 0.993 | 0.348 |
| <b>Mass Fraction Water</b>   | 0.069 | 0.069 | 0.007 | 0.598 | 0.598 | 0.598 | 0.598 | 0.007 | 0.598 |

---

|                                   | <b>Stream 17</b> | <b>Stream 18</b> | <b>Stream 19</b> | <b>Stream 20</b> | <b>Stream 21</b> |
|-----------------------------------|------------------|------------------|------------------|------------------|------------------|
| <b>Temperature (°C)</b>           | 20.8             | 32.2             | 73.4             | 41.4             | 41.5             |
| <b>Pressure (atm)</b>             | 1.00             | 1.00             | 1.00             | 0.10             | 1.00             |
| <b>Total Mass Flow (kg/hr)</b>    | 6.475            | 0.760            | 0.968            | 0.769            | 0.769            |
| <b>Mass Fraction Butyric Acid</b> | 0.000            | 0.055            | 0.990            | 0.000            | 0.000            |
| <b>Mass Fraction TOA</b>          | 0.000            | 0.000            | 0.000            | 1.000            | 1.000            |
| <b>Mass Fraction Acetone</b>      | 0.993            | 0.348            | 0.007            | 0.000            | 0.000            |
| <b>Mass Fraction Water</b>        | 0.007            | 0.598            | 0.003            | 0.000            | 0.000            |

**Table S6. Stream Table for 90.57 g per L Butyric Acid with Methanol and 5 wt.% Water**

|                                   | <b>Stream 1</b> | <b>Stream 2</b> | <b>Stream 3</b> | <b>Stream 4</b> | <b>Stream 5</b> | <b>Stream 6</b> | <b>Stream 7</b> | <b>Stream 8</b> | <b>Stream 9</b> |
|-----------------------------------|-----------------|-----------------|-----------------|-----------------|-----------------|-----------------|-----------------|-----------------|-----------------|
| <b>Temperature (°C)</b>           | 25.0            | 21.8            | 24.4            | 24.4            | 24.4            | 54.1            | 24.7            | 82.5            | 52.2            |
| <b>Pressure (atm)</b>             | 0.12            | 0.12            | 0.12            | 0.12            | 0.12            | 0.12            | 0.1             | 0.1             | 0.15            |
| <b>Total Mass Flow (kg/hr)</b>    | 8.990           | 5.733           | 3.290           | 3.257           | 0.033           | 0.033           | 2.259           | 0.998           | 7.992           |
| <b>Mass Fraction Butyric Acid</b> | 0.111           | 0.000           | 0.306           | 0.306           | 0.306           | 0.306           | 0.004           | 0.991           | 0.001           |
| <b>Mass Fraction Methanol</b>     | 0.839           | 0.967           | 0.614           | 0.614           | 0.614           | 0.614           | 0.882           | 0.006           | 0.943           |
| <b>Mass Fraction Water</b>        | 0.050           | 0.033           | 0.080           | 0.080           | 0.080           | 0.080           | 0.114           | 0.004           | 0.056           |

|                                   | <b>Stream 10</b> | <b>Stream 11</b> | <b>Stream 12</b> | <b>Stream 13</b> | <b>Stream 14</b> | <b>Stream 15</b> | <b>Stream 16</b> | <b>Stream 17</b> |
|-----------------------------------|------------------|------------------|------------------|------------------|------------------|------------------|------------------|------------------|
| <b>Temperature (°C)</b>           | 21.0             | 19.9             | 41.6             | 19.9             | 41.6             | 64.1             | 64.2             | 21.0             |
| <b>Pressure (atm)</b>             | 0.13             | 0.13             | 0.13             | 1.00             | 1.00             | 0.10             | 1.00             | 0.13             |
| <b>Total Mass Flow (kg/hr)</b>    | 7.992            | 7.550            | 0.442            | 7.550            | 0.442            | 0.998            | 0.998            | 7.992            |
| <b>Mass Fraction Butyric Acid</b> | 0.001            | 0.000            | 0.026            | 0.000            | 0.026            | 0.991            | 0.991            | 0.001            |

|                               |       |       |       |       |       |       |       |       |
|-------------------------------|-------|-------|-------|-------|-------|-------|-------|-------|
| <b>Mass Fraction Methanol</b> | 0.943 | 0.991 | 0.123 | 0.991 | 0.123 | 0.006 | 0.006 | 0.943 |
| <b>Mass Fraction Water</b>    | 0.056 | 0.009 | 0.851 | 0.009 | 0.851 | 0.004 | 0.004 | 0.056 |

**Table S7. Separation cost associated with capital expenditures**

| Resin                                       |        |        | PVP                  |                      |                        |                      |
|---------------------------------------------|--------|--------|----------------------|----------------------|------------------------|----------------------|
| Solvent                                     |        |        | Water                | Acetone              | Cyanex/Acetone (10:90) | Methanol             |
| <b>Total Installed Cost (TIC)</b>           |        |        | <b>\$ 23,041,532</b> | <b>\$ 18,407,532</b> | <b>\$ 18,935,532</b>   | <b>\$ 17,723,532</b> |
| Warehouse                                   | 4.0%   | of TIC | \$ 921,661           | \$ 736,301           | \$ 757,421             | \$ 708,941           |
| Site Development                            | 9.0%   | of TIC | \$ 2,073,738         | \$ 1,656,678         | \$ 1,704,198           | \$ 1,595,118         |
| Additional Piping                           | 4.5%   | of TIC | \$ 1,036,869         | \$ 828,339           | \$ 852,099             | \$ 797,559           |
| <b>Total Direct Costs (TDC)</b>             |        |        | <b>\$ 27,073,800</b> | <b>\$ 21,628,850</b> | <b>\$ 22,249,250</b>   | <b>\$ 20,825,150</b> |
| Prorateable Expenses                        | 10.0%  | of TDC | \$ 2,707,380         | \$ 2,162,885         | \$ 2,224,925           | \$ 2,082,515         |
| Field Expenses                              | 10.0%  | of TDC | \$ 2,707,380         | \$ 2,162,885         | \$ 2,224,925           | \$ 2,082,515         |
| Home Office & Construction Fee              | 20.0%  | of TDC | \$ 5,414,760         | \$ 4,325,770         | \$ 4,449,850           | \$ 4,165,030         |
| Project Contingency                         | 10.0%  | of TDC | \$ 2,707,380         | \$ 2,162,885         | \$ 2,224,925           | \$ 2,082,515         |
| Other Costs (Start-Up, Permits, etc.)       | 10.0%  | of TDC | \$ 2,707,380         | \$ 2,162,885         | \$ 2,224,925           | \$ 2,082,515         |
| <b>Total Indirect Costs</b>                 |        |        | <b>\$ 16,244,280</b> | <b>\$ 12,977,310</b> | <b>\$ 13,349,550</b>   | <b>\$ 12,495,090</b> |
| <b>Fixed Capital Investment (FCI)</b>       |        |        | <b>\$ 43,318,081</b> | <b>\$ 34,606,161</b> | <b>\$ 35,598,801</b>   | <b>\$ 33,320,241</b> |
| <b>Plant Life</b>                           | 30     | years  |                      |                      |                        |                      |
| <b>Capital Depreciation</b>                 |        |        | <b>\$ 2,165,904</b>  | <b>\$ 1,730,308</b>  | <b>\$ 1,779,940</b>    | <b>\$ 1,666,012</b>  |
| <b>Butyric Acid Yield</b>                   | 21,075 | kg/hr  |                      |                      |                        |                      |
| <b>Operating Hours per Annum</b>            | 7,884  | hr     |                      |                      |                        |                      |
| <b>Separation Cost (\$/kg butyric acid)</b> |        |        | <b>0.01</b>          | <b>0.01</b>          | <b>0.01</b>            | <b>0.01</b>          |

| Resin                             |  | Dowex 77             |                      |                        | Strong Ion           |                     |
|-----------------------------------|--|----------------------|----------------------|------------------------|----------------------|---------------------|
| Solvent                           |  | Water                | Acetone              | Cyanex/Acetone (10:90) | Methanol             | 4M HCl              |
| <b>Total Installed Cost (TIC)</b> |  | <b>\$ 23,041,532</b> | <b>\$ 19,619,532</b> | <b>\$ 20,493,532</b>   | <b>\$ 19,632,532</b> | <b>\$ 7,347,532</b> |
| Warehouse                         |  | \$ 921,661           | \$ 784,781           | \$ 819,741             | \$ 785,301           | \$ 293,901          |
| Site Development                  |  | \$ 2,073,738         | \$ 1,765,758         | \$ 1,844,418           | \$ 1,766,928         | \$ 661,278          |

|                                             |                      |                      |                      |                      |                      |
|---------------------------------------------|----------------------|----------------------|----------------------|----------------------|----------------------|
| Additional Piping                           | \$ 1,036,869         | \$ 882,879           | \$ 922,209           | \$ 883,464           | \$ 330,639           |
| <b>Total Direct Costs (TDC)</b>             | <b>\$ 27,073,800</b> | <b>\$ 23,052,950</b> | <b>\$ 24,079,900</b> | <b>\$ 23,068,225</b> | <b>\$ 8,633,350</b>  |
| Prorateable Expenses                        | \$ 2,707,380         | \$ 2,305,295         | \$ 2,407,990         | \$ 2,306,823         | \$ 863,335           |
| Field Expenses                              | \$ 2,707,380         | \$ 2,305,295         | \$ 2,407,990         | \$ 2,306,823         | \$ 863,335           |
| Home Office & Construction Fee              | \$ 5,414,760         | \$ 4,610,590         | \$ 4,815,980         | \$ 4,613,645         | \$ 1,726,670         |
| Project Contingency                         | \$ 2,707,380         | \$ 2,305,295         | \$ 2,407,990         | \$ 2,306,823         | \$ 863,335           |
| Other Costs (Start-Up, Permits, etc.)       | \$ 2,707,380         | \$ 2,305,295         | \$ 2,407,990         | \$ 2,306,823         | \$ 863,335           |
| <b>Total Indirect Costs</b>                 | <b>\$ 16,244,280</b> | <b>\$ 13,831,770</b> | <b>\$ 14,447,940</b> | <b>\$ 13,840,935</b> | <b>\$ 5,180,010</b>  |
| <b>Fixed Capital Investment (FCI)</b>       | <b>\$ 43,318,081</b> | <b>\$ 36,884,721</b> | <b>\$ 38,527,841</b> | <b>\$ 36,909,161</b> | <b>\$ 13,813,361</b> |
| <b>Capital Depreciation</b>                 | <b>\$ 2,165,904</b>  | <b>\$ 1,844,236</b>  | <b>\$ 1,926,392</b>  | <b>\$ 1,845,458</b>  | <b>\$ 690,668</b>    |
| <b>Separation Cost (\$/kg butyric acid)</b> | <b>0.01</b>          | <b>0.01</b>          | <b>0.01</b>          | <b>0.01</b>          | <b>0.004</b>         |

**Table S8. OPEX costs associated with raw materials and utilities**

|                          | Unit Price | Unit         | Source                        |
|--------------------------|------------|--------------|-------------------------------|
| <b>Resin costs</b>       |            |              |                               |
| PVP                      |            | 875 \$/kg    | Vertellus <sup>1</sup>        |
| Dowex 77                 |            | 15 \$/kg     | Lenntech                      |
| <b>Solvent costs</b>     |            |              |                               |
| Acetone                  |            | 0.78 \$/L    | IHS Markit – PEP <sup>3</sup> |
| Methanol                 |            | 0.27 \$/L    | IHS Markit – PEP <sup>3</sup> |
| Water                    |            | 0.00038 \$/L |                               |
| Cyanex 923               |            | 20 \$/L      | Solvay <sup>5</sup>           |
| NaOH (50 wt.%)           |            | 0.41 \$/kg   | IHS - PEP                     |
| HCl (35.2 wt.%)          |            | 0.18 \$/kg   | IHS – CEH <sup>4</sup>        |
| Low pressure steam (LPS) |            | 5.69 \$/GJ   | This study                    |
|                          |            | 0.006 \$/MJ  |                               |
| Electricity              |            | 0.068 \$/kWh | Davis 2018                    |
|                          |            | 0.02 \$/MJ   |                               |

1. PVP bulk cost was estimated from a 1,500 kg batch
2. Dowex 77 bulk cost was estimated from communication with Lenntech (USA)
3. PEP: Process Economics Program
4. CEH: Chemical Economics Handbooks
5. The Cyanex 923 cost was discounted 40% to account for R&D and scale-up within the field

**Table S9. GHG emission and fossil energy demand factors**

| GHG | Unit | Fossil Energy | Unit | Reference |
|-----|------|---------------|------|-----------|
|-----|------|---------------|------|-----------|

|                    |      |                          |      |        |            |
|--------------------|------|--------------------------|------|--------|------------|
| PVP                | 3.39 | kg CO <sub>2</sub> e/kg  | 57.1 | MJ/kg  | This study |
| Dowex 77           | 3.18 | kg CO <sub>2</sub> e/kg  | 92.5 | MJ/kg  | This study |
| Acetone            | 1.36 | kg CO <sub>2</sub> e/kg  | 46.2 | MJ/kg  | Datasmart  |
| Cyanex 923         | 15.4 | kg CO <sub>2</sub> e/kg  | 229  | MJ/kg  | This study |
| NaOH (50 wt.%)     | 1.61 | kg CO <sub>2</sub> e/kg  | 18.7 | MJ/kg  | Datasmart  |
| HCl (35.2 wt.%)    | 0.67 | kg CO <sub>2</sub> e/kg  | 8.31 | MJ/kg  | Datasmart  |
| Low pressure steam | 0.10 | kg CO <sub>2</sub> e/MJ  | 0.16 | MJ/MJ  | GREET      |
| Electricity        | 0.55 | kg CO <sub>2</sub> e/kWh | 6.53 | MJ/kWh | GREET      |

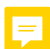

### Langmuir equilibrium Isotherm

The Langmuir equilibrium isotherm model which assumes ideal 1:1 molar interaction between adsorbent and active site leads to an uptake plateau (equation S1).



$$q = \frac{q_{max} K C_{EQ}}{(1 + K C_{EQ})} \quad (\text{equation S1})$$

In equation S1,  $q$  and  $q_{max}$  are the uptake of acid onto the resin and maximum uptake respectively (g acid per g dry resin),  $C_{EQ}$  is the equilibrium concentration of acid in the solution (g L<sup>-1</sup>),  $K$  is the adsorption capacity of the resin (L g<sup>-1</sup>).

### Equations to estimate the Freundlich isotherm parameters (K and n) and the free acid concentration

There is a linear correlation between the logarithm of the adsorption capacity and both the pK<sub>a</sub> of the resins' functional group monomer (equation S2) and the apparent pK<sub>a</sub> of the resin (equation S3). Equation S4 gives the relationship between the n parameter and the apparent pK<sub>a</sub> of the resin

$$\log_{10}(K) = 0.42 (pK_a) - 5.1 \quad (R2 = 0.97) \quad (\text{Equation 2})$$

$$\log_{10}(K) = 0.6 (pK_a) - 5.9 \quad (R2 = 0.99) \quad (\text{Equation 3})$$

$$(n) = -0.08 (pK_a) + 0.97 \quad (R2 = 0.97) \quad (\text{Equation S4})$$

$$(n) = -0.11 (pK_a) + 1.1 \quad (R2 = 0.99) \quad (\text{Equation S5})$$

$$pH = pK_a + \log_{10} \left( \frac{A^-}{HA} \right) \quad (\text{Equation S6})$$

$$\text{Titer} = HA + A^- \quad (\text{equation S7})$$

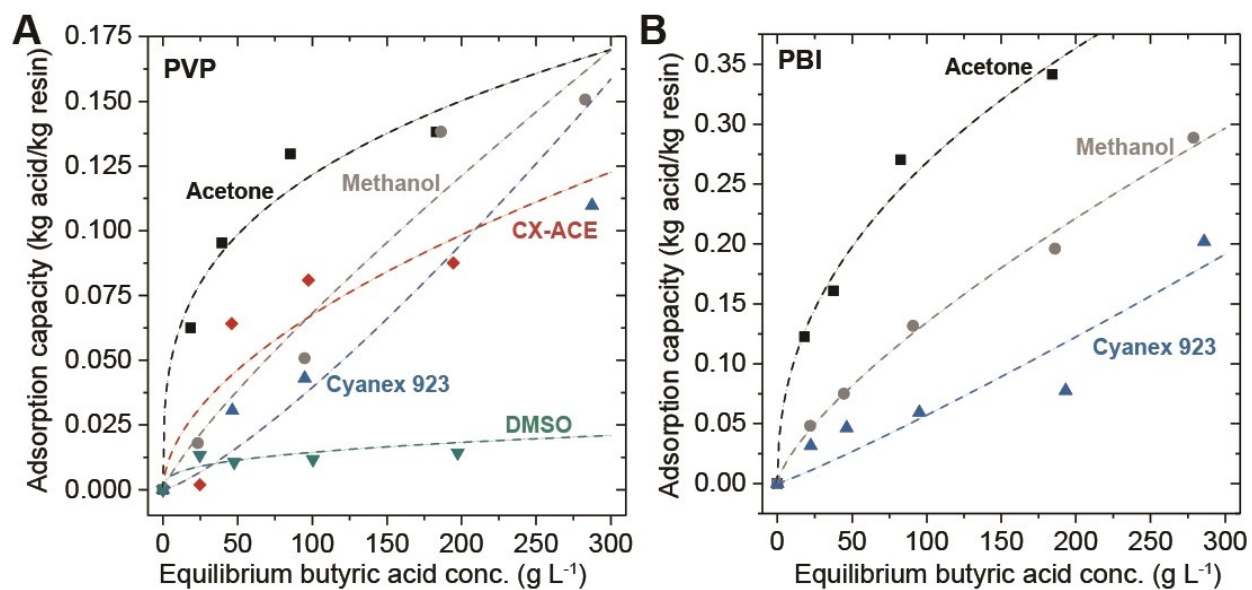

**Figure S1. Adsorption Isotherm of Butyric acid**

The experimental equilibrium data shows the adsorption of butyric acid onto (A) PVP and (B) PBI resin in the presence of solvents. The data is fit to the Freundlich model (equation 3) to determine the desorption constant of solvents which is a constant that is proportional to the affinity of the acid for the resin.

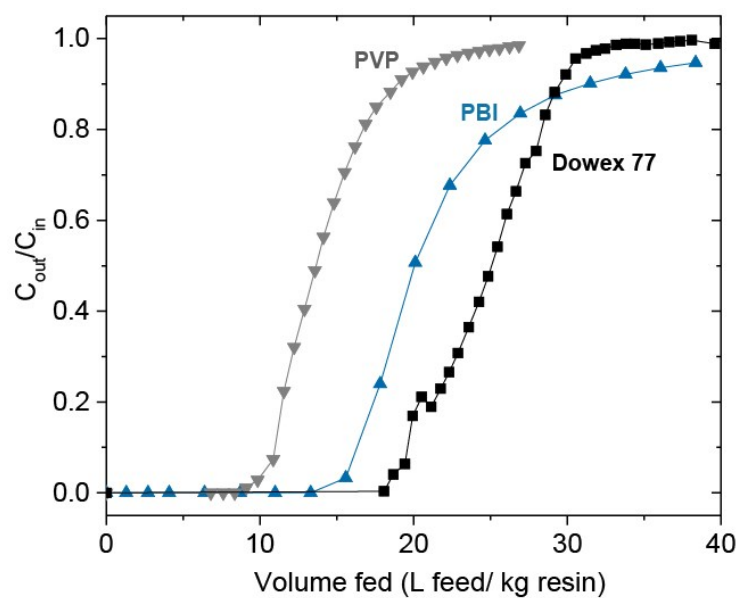

**Figure S2. Breakthrough Point (BTP) Curve**

The breakthrough point (BTP) of PVP, PBI, and Dowex 77 was determined by flowing a solution of  $20 \text{ g L}^{-1}$  ( $C_{in}$ ) butyric acid onto fixed-bed columns. The outlet concentration ( $C_{out}$ ) of butyric acid was measured to determine the BTP, which corresponds to the volume at which butyric acid begins to be present in the eluate. The BTP was determined to be  $7.4 \text{ L kg}^{-1}$  resin,  $15.5 \text{ L kg}^{-1}$  resin, and  $18.0 \text{ L kg}^{-1}$  for PVP, PBI, Dowex 77 respectively.

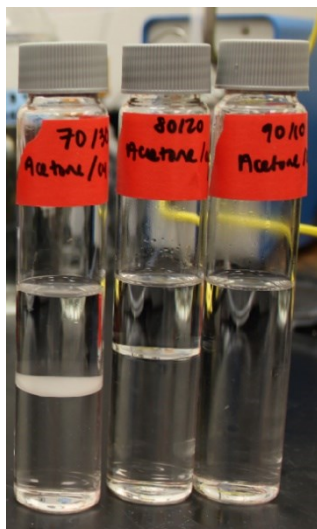

**Figure S3.** From left to right: 70 wt. % acetone, 30 wt. % Cyanex 923 mixed with water, 80 wt. % acetone, 20 wt. % Cyanex 923 mixed with water, and 90 wt. % acetone, 10 wt. % Cyanex 923 mixed with water. Only the 90 wt. % acetone, 10 wt. % Cyanex 923 is miscible with water and therefore was selected as an elution solvent for fixed-bed experiments.

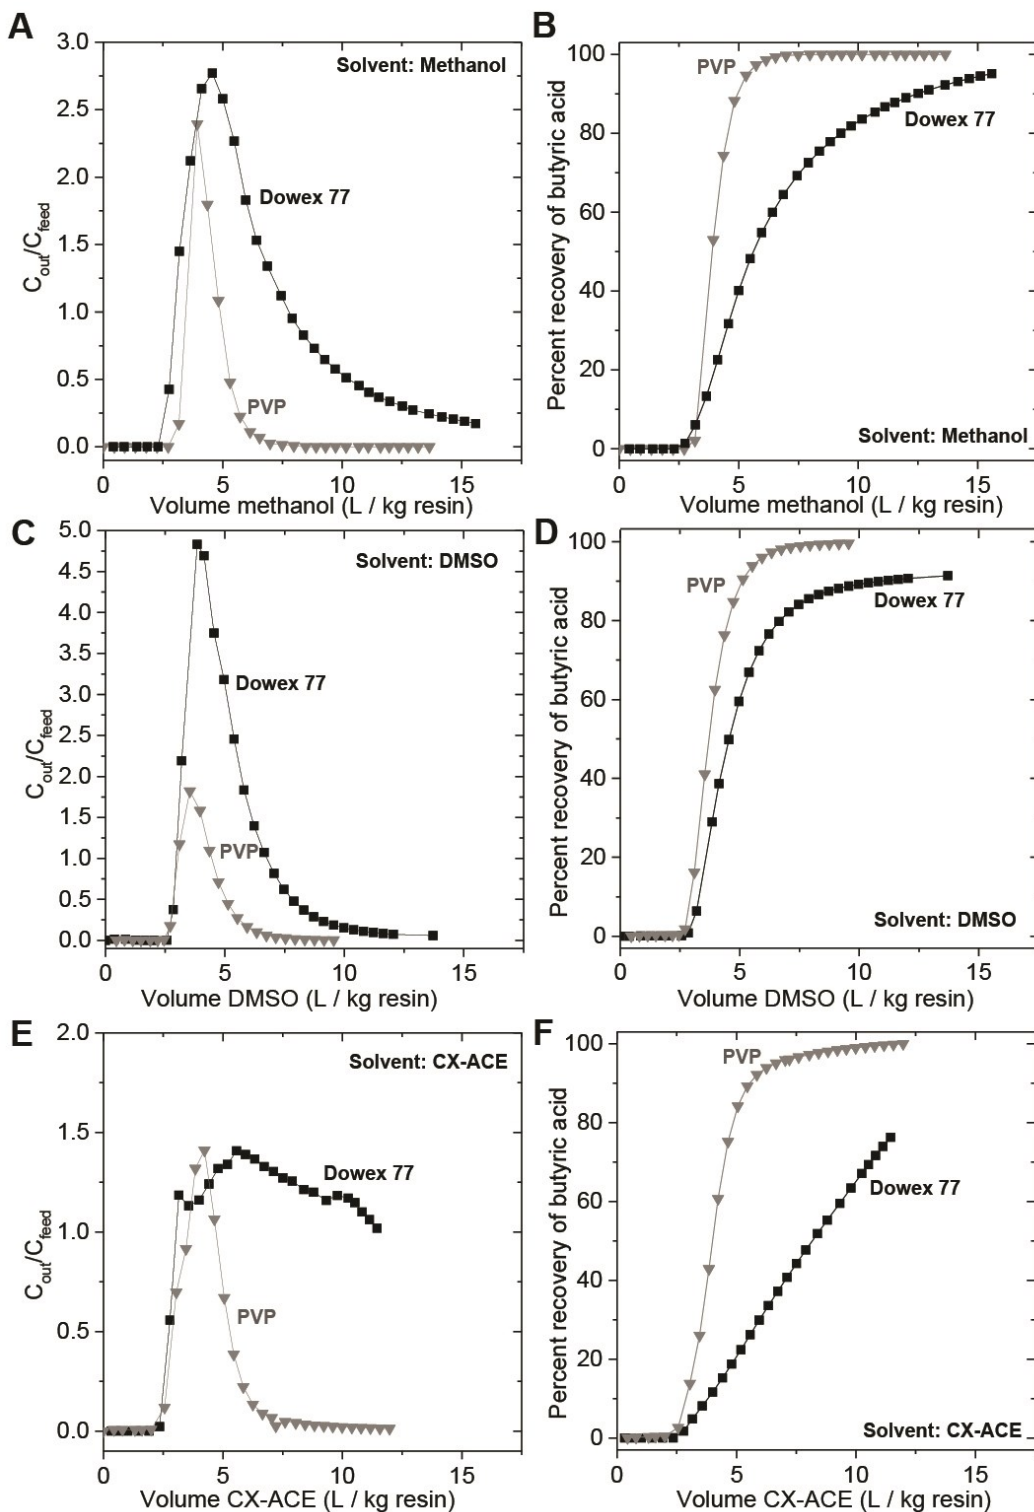

**Figure S4. Elution curves Figure S2.**

Normalized eluate concentration ( $C_{out}$ ) for PVP and Dowex 77 using (A) methanol, (C) DMSO, or (E) CX-ACE as the elution solvent. (B) Mass recovery of butyric acid in the eluate as a function of the total (B) methanol, (D) DMSO, or (F) CX-ACE volume used. Surprisingly, the CX-acetone solvent showed poor performance for butyric acid elution as indicated by the tailing on the butyric acid peak in Figure S4E.

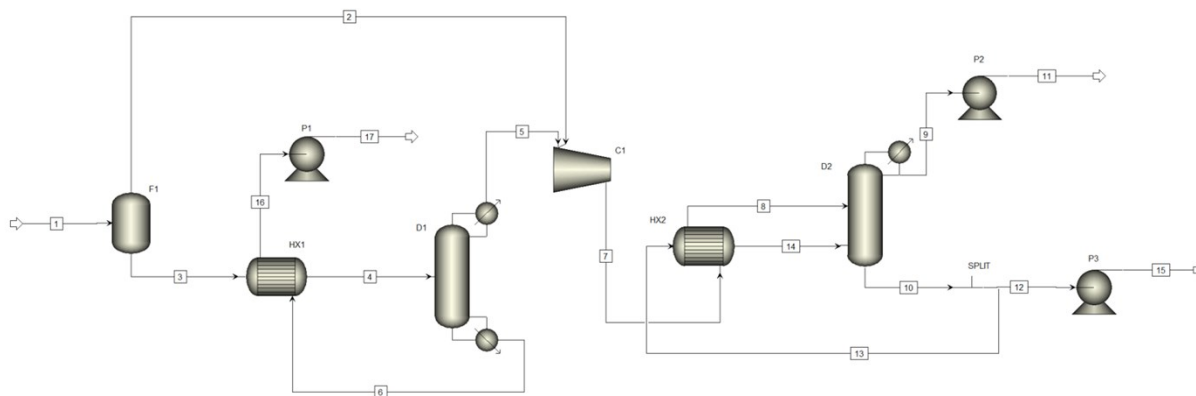

**Figure S5.** PFD for acetone and methanol recycling and butyric acid isolation. In order to separate the majority of the solvent upfront, a 3 stage RADFRAC distillation was utilized in place of the flash seen in the figure above for the methanol recovery process.

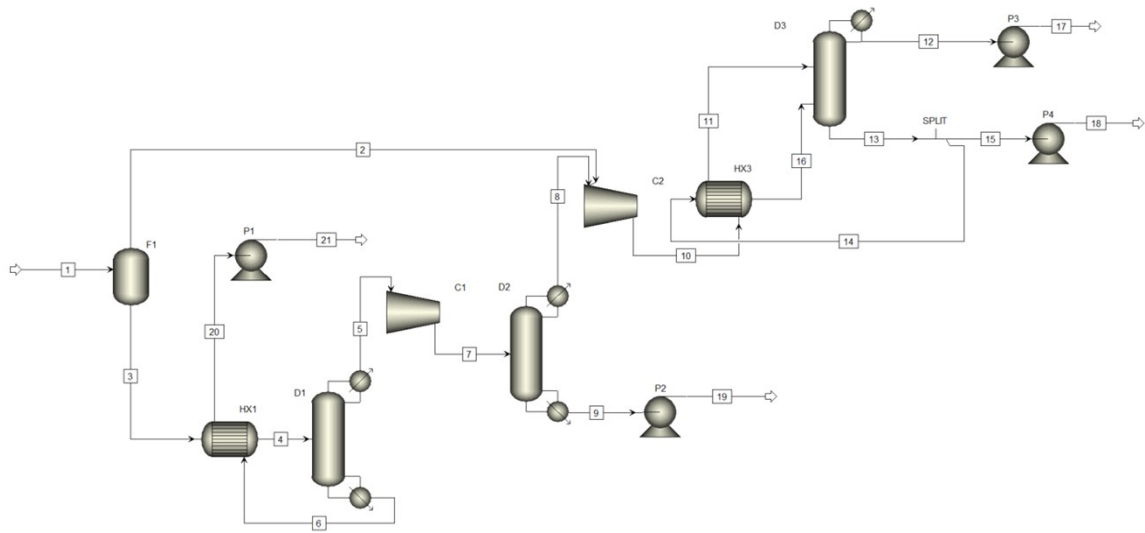

**Figure S6.** PFD for acetone and TOA or Cyanex 923 recycling and butyric acid isolation

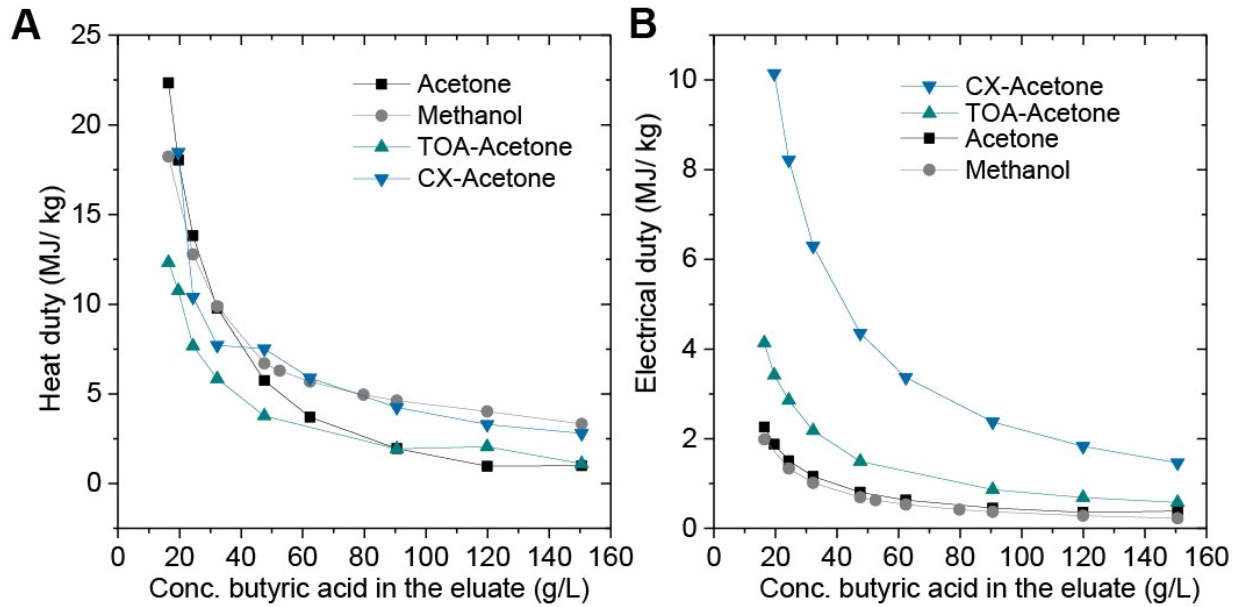

**Figure S7. Distillation Heat and Electrical Duty**

Distillation heat and electrical duties as a function of butyric acid concentration in the eluate which is the distillation feed stream. The solvent is either methanol, acetone, or 10 wt.% TOA or Cyanex 923 (CX) in acetone. For the CX case, the heating and electric demand was estimated from the TOA-acetone curves.



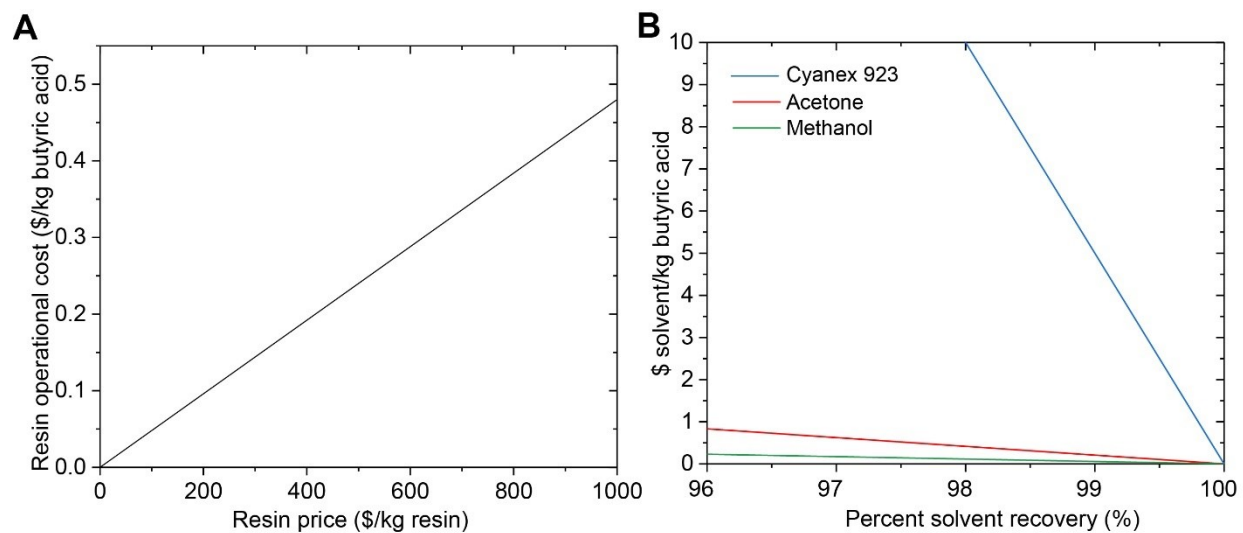

**Figure S8. Operational cost sensitivity**

(A) Resin operational cost on a per kg butyric acid product basis as a function of resin raw material price and (B) Solvent operational cost on a per kg butyric acid product basis as a function of percent solvent recovery from the distillation process.

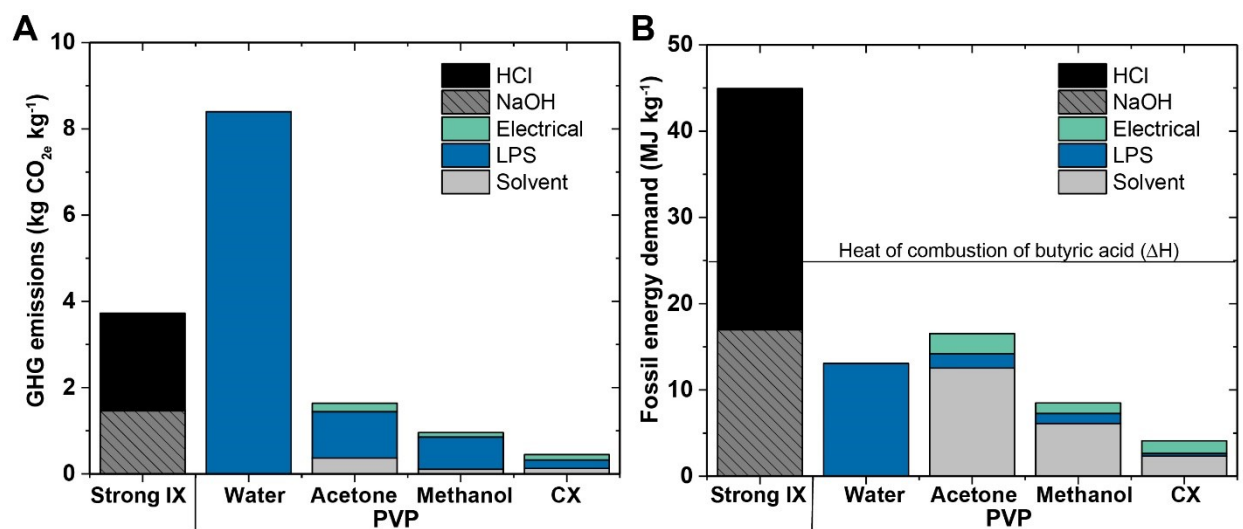

**Figure S9. Environmental Impacts of the WBA and Strong IX Processes**  
 (A) Fossil energy demand and (B) The GHG emission of the WBA processes compared with the strong IX process.

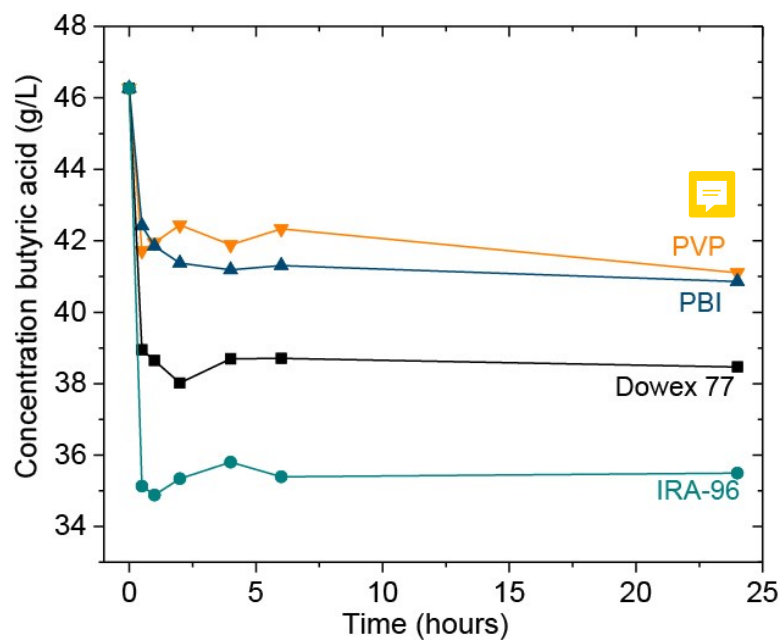

**Figure S10. Kinetics of butyric acid adsorption by resins**

The butyric acid concentration in the aqueous phase is shown as a function of time to probe the time needed to reach equilibrium. Within two hours, the concentration of butyric acid in the aqueous phase was within 10% of the concentration at 24 hours. A 24-hour benchmark equilibration time for all sample was used throughout the manuscript.

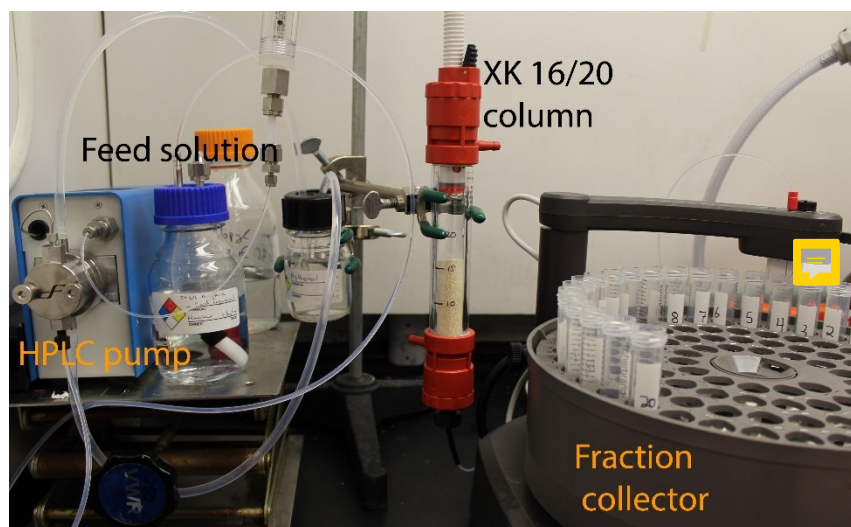

**Figure S11. Photo of Fixed-bed Column System**

## **Aspen Plus Simulations**

### **Thermodynamic Property Methods**

The UNIFAC property method was used to estimate thermodynamic properties of butyric acid and water as experimental data provided by Aspen Plus was inaccurate and could not be fit to a nonrandom two-liquid (NRTL) equation-of-state. Functional groups for each component were identified and specified in each simulation. A  $T_{xy}$  diagram was generated using the UNIFAC property method for butyric acid and water and is plotted in Figure S10.

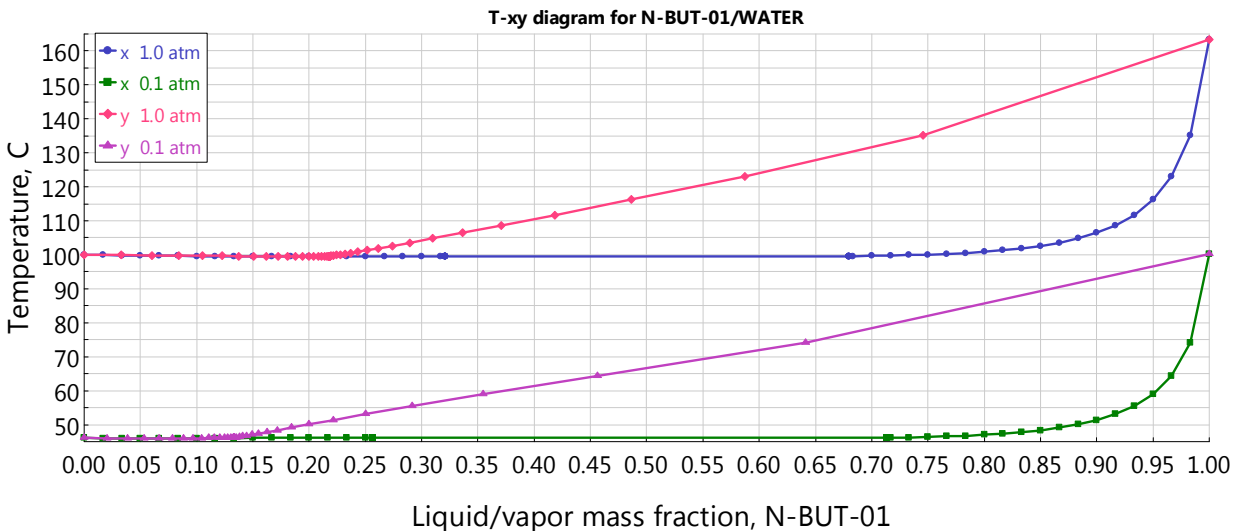

**Figure S12.**  $T_{xy}$  diagram for butyric acid and water at 1 atmosphere generated using the UNIFAC and function group assignment in Aspen Plus.

### Process Flow Diagram

The process flow diagram for the acetone and methanol simulation is shown in Figures S5. The feed stream (1) contained varying amounts of butyric acid, acetone and water entering the flash drum (F1) at 20°C and the same pressure as the flash distillation. 5 wt. % water was added to the feed stream to simulate the residue water that is carried over from desorption. Water elution profile from the column depends on column operational parameters such as flow rate and product recovery, and ranges from a minimum of 7.6% in our data to below 1% in optimized SMB systems.<sup>12</sup> The flash drum pressure was set to achieve a 99% recovery of butyric acid in the bottoms. This enables the much of the solvent to bypass the first multi-stage distillation column where butyric acid is separated from water and residue solvent. The bottom stream of the flash (F1) was preheated via a heat exchanger (HX1) to preheat the stream (4) before entering the distillation column (D1). Countercurrent heat exchangers with a 10 K minimum approach temperature were used with the shortcut calculation method. The preheated stream (4) entered the above stage 1 of a 3 stage RADFRAC distillation column (D1) operating with a reflux ratio of 1.1 at a pressure of 0.1 atmospheres. The bottoms rate was optimized to ensure a >95% recovery and >99% purity of butyric acid in the distillate bottoms (6). The distillate stream (5) of the distillation column (D1) contained the remaining acetone and water remaining after the flash. The vaporized solvent from the flash (2) and the first distillation column (5) was then compressed to 0.25 atm for the acetone case (0.35 atm for methanol) using mechanical vapor recompression technology in order to supply enough heat to power the reboiler (HX3) of the solvent recovery column (D2). The condensed solvent entered the solvent recovery distillation column (D2) on stage 11 of 12 RADFRAC distillation column operating at a pressure of 0.25 atmospheres. The solvent recovery column was optimized by varying the reflux ratio and the split fraction (SPLIT) to achieve a >99% recovery and purity of the solvent. Pumps set to a discharge pressure of 1 atmosphere were added at the outlet process streams to ensure that the product, solvent, and waste streams were no longer under vacuum. In order to separate the majority of the methanol upfront, a 3 stage RADFRAC distillation was utilized in place of the flash (heat integration between the bottoms of the second distillation column and the reboiler of the first column was performed in order to utilize energy present in the system).

For the 10 wt.% Cyanex in acetone solvent case, there are additional process units in order to separate the four components. As seen in Figure S6, there is an additional column added to separate the Cyanex (TOA in Aspen Plus) from the acid. In this simulation, the feed stream with varying concentrations entered the flash drum set to 20°C and set to the flash drum pressure. The flash was optimized the same way as with the acetone/methanol cases. The bottoms stream containing butyric acid, TOA, and the remaining water and acetone was preheated using a heat exchanger (HX1) and entered the RADFRAC distillation column (D1) above stage 2 of 3 with a reflux ratio of 0.1 and a column pressure of 0.1 atmospheres. The distillate rate was optimized to recover the butyric acid in the distillate and >99% of the TOA in the bottoms. The distillate of column D1 entered on stage 3 of a 3 stage RADFRAC distillation column (D2). The column reflux ratio was 1.2 with a column pressure of 0.1 atmospheres. The distillate rate was optimized to recover > 95% of butyric acid with a >99% purity out the bottoms. The remaining solvent in the distillate stream of the distillation column (D2) was compressed to 0.25 atmospheres in order to supply enough heat to power the reboiler (HX3) of the second solvent recovery column (D3). The stream (11) entered on stage 10 of a 12 stage RADFRAC distillation column at 0.25 atmospheres. The solvent recovery column (D3) was optimized by varying the reflux ratio and the split fraction (SPLIT) to achieve a >99% recovery and purity of the solvent. Pumps set to a discharge pressure of 1 atmosphere were added at the outlet process streams to ensure that the product, solvent, and waste streams were no longer under vacuum.

### Energy Input Determination

Heating and cooling duties for each of the unit operations were reported by Aspen Plus. Vacuum pump duties were calculated manually using the following isentropic equation assuming a vacuum pump efficiency of 0.5 as these values are not calculated by Aspen Plus.

$$w_{in} = \left( \frac{1}{\eta_c} \right) \left( \frac{kRT_1}{k-1} \right) \left[ \left( \frac{P_2}{P_1} \right)^{\frac{k-1}{k}} - 1 \right]$$

where:

$w_{in}$ : Vacuum pump net work in  $\frac{kJ}{mol}$  of evacuated gas

$\eta_c$ : Pump efficiency

$k$ : Heat capacity ratio  $\left( \frac{C_p}{C_v} \right)$

$R$  : Ideal gas constant in  $\frac{kJ}{mol * K}$

$T_1$  : Temperature at the inlet of the vacuum pump in degrees Kelvin

$P_2$  : Pressure at the inlet of the vacuum pump

$P_1$  : Discharge pressure of the vacuum pump

For each simulation, the heat capacity ratio and temperature of the distillates were calculated by Aspen plus. The work per mole of gas evacuated calculated from this equation was then multiplied by the molar flow rate of the distillate stream to determine the energy required per hour of operation.

All energy inputs (heating, cooling, and vacuum) were then normalized to the production rate of butyric acid to achieve an energy input of MJ per kilogram of pure butyric acid distilled.

## REFERENCES

1. Srivastava, A., Roychoudhury, P. K., Sahai, V. (1992) Extractive lactic acid fermentation using ion-exchange resin. *Biotechnology and Bioengineering* 39, 607-613.
2. Fu, Y. Q., Chen, Y., Li, S., Huang, H. (2009) Fixed-Bed Adsorption Study for Fumaric Acid Removal from Aqueous Solutions by Amberlite IRA-400 Resin. *Chemical engineering & technology* 32, 1625-1629.

3. Cao, X., Yun, H. S., Koo, Y.-M. (2002) Recovery of L-(+)-lactic acid by anion exchange resin Amberlite IRA-400. *Biochemical Engineering Journal* 11, 189-196.
4. Sosa, A. V., Córdoba, P. R., Perotti, N. I. (2001) Fluidized bed design parameters affecting novel lactic acid downstream processing. *Biotechnology Progress* 17, 1079-1083.
5. González-Vara y R, A., Vaccari, G., Dosi, E., Trilli, A., Rossi, M., Matteuzzi, D. (2000) Enhanced production of L-(+)-lactic acid in chemostat by *Lactobacillus casei* DSM 20011 using ion-exchange resins and cross-flow filtration in a fully automated pilot plant controlled via NIR. *Biotechnology and Bioengineering* 67, 147-156.
6. Magalhães Jr, A. I., de Carvalho, J. I. C., Ramírez, E. N. I. M., Medina, J. D. C., Soccol, C. R. (2015) Separation of itaconic acid from aqueous solution onto ion-exchange resins. *Journal of Chemical & Engineering Data* 61, 430-437.
7. Monteagudo, J. M., Aldavero, M. (1999) Production of L-lactic acid by *Lactobacillus delbrueckii* in chemostat culture using an ion exchange resins system. *Journal of Chemical Technology & Biotechnology: International Research in Process, Environmental & Clean Technology* 74, 627-634.
8. Leite, J. A., Fernandes, B. S., Pozzi, E., Barboza, M., Zaiat, M. (2008) Application of an anaerobic packed-bed bioreactor for the production of hydrogen and organic acids. *International Journal of Hydrogen Energy* 33, 579-586.
9. Cao, N., Du, J., Gong, C., Tsao, G. (1996) Simultaneous Production and Recovery of Fumaric Acid from Immobilized *Rhizopus oryzae* with a Rotary Biofilm Contactor and an Adsorption Column. *Applied and Environmental Microbiology* 62, 2926-2931.
10. Zhang, K., Yang, S.-T. (2015) In situ recovery of fumaric acid by intermittent adsorption with IRA-900 ion exchange resin for enhanced fumaric acid production by *Rhizopus oryzae*. *Biochemical Engineering Journal* 96, 38-45.
11. López-Garzón, C. S., van der Wielen, L. A., Straathof, A. J. (2016) Ester production from bio-based dicarboxylates via direct downstream catalysis: succinate and 2, 5-furandicarboxylate dimethyl esters. *RSC Advances* 6, 3823-3829.
12. López-Garzón, C. S., Ottens, M., van der Wielen, L. A., Straathof, A. J. (2012) Direct downstream catalysis: From succinate to its diethyl ester without intermediate acidification. *Chemical Engineering Journal* 200, 637-644.
13. Dethe, M., Marathe, K., Gaikar, V. (2006) Adsorption of lactic acid on weak base polymeric resins. *Separation Science and Technology* 41, 2947-2971.
14. Bayazit, S. a. S., İnci, I. s., Uslu, H. (2009) Adsorption of Glutaric Acid and Glyoxylic Acid onto Weakly Basic Ion-Exchange Resin: Equilibrium and Kinetics. *Journal of Chemical & Engineering Data* 55, 679-684.
15. Garcia, A. A., King, C. J. (1989) The use of basic polymer sorbents for the recovery of acetic acid from dilute aqueous solution. *Ind. Eng. Chem. Res.* 28, 204-212.



16. Dai, Y., King, C. J. (1996) Selectivity between lactic acid and glucose during recovery of lactic acid with basic extractants and polymeric sorbents. *Industrial & engineering chemistry research* 35, 1215-1224.
17. Husson, S. M., King, C. J. (1998) Regeneration of lactic and succinic acid-laden basic sorbents by leaching with a volatile base in an organic solvent. *Industrial & engineering chemistry research* 37, 2996-3005.
18. Gao, Q., Liu, F., Zhang, T., Zhang, J., Jia, S., Yu, C., Jiang, K., Gao, N. (2010) The role of lactic acid adsorption by ion exchange chromatography. *PLoS one* 5, e13948.
19. Jun, Y.-S., Huh, Y. S., Park, H. S., Thomas, A., Jeon, S. J., Lee, E. Z., Won, H. J., Hong, W. H., Lee, S. Y., Hong, Y. K. (2007) Adsorption of pyruvic and succinic acid by amine-functionalized SBA-15 for the purification of succinic acid from fermentation broth. *The Journal of Physical Chemistry C* 111, 13076-13086.
20. Kawabata, N., Ohira, K. (1979) Removal and recovery of organic pollutants from aquatic environment. 1. Vinylpyridine-divinylbenzene copolymer as a polymeric adsorbent for removal and recovery of phenol from aqueous solution. *Environmental Science & Technology* 13, 1396-1402.
21. Chen, C., Ju, L.-K. (2002) Coupled lactic acid fermentation and adsorption. *Applied Microbiology and Biotechnology* 59, 170-174.
22. Chanda, M., O'Driscoll, K., Rempel, G. (1985) Sorption of phenolics and carboxylic acids on polybenzimidazole. *Reactive Polymers, Ion Exchangers, Sorbents* 4, 39-48.
23. Van den Bergh, M., Van de Voorde, B., De Vos, D. (2017) Adsorption and Selective Recovery of Citric Acid with Poly (4-vinylpyridine). *ChemSusChem* 10, 4864-4871.
24. Wu, J., Peng, Q., Arlt, W., Minceva, M. (2009) Model-based design of a pilot-scale simulated moving bed for purification of citric acid from fermentation broth. *Journal of Chromatography A* 1216, 8793-8805.
25. Delgado, J. A., Águeda, V. I., Uguina, M. Á., García, Á., Matarredona, J., Moral, R. (2018) Modeling of the separation of lactic acid from an aqueous mixture by adsorption on polyvinylpyridine resin and desorption with methanol. *Separation and Purification Technology* 200, 307-317.
26. Efe, C. a. r., van der Wielen, L. A., Straathof, A. J. (2010) High silica zeolites as an alternative to weak base adsorbents in succinic acid recovery. *Industrial & Engineering Chemistry Research* 49, 1837-1843.
27. Dziwinski, E., Szymanowski, J. (1998) Composition of Cyanex® 923, Cyanex® 925, Cyanex® 921 and TOPO. *Solvent Extraction and Ion Exchange* 16, 1515-1525.
28. Kamlet, M. J., Taft, R. (1976) The solvatochromic comparison method. I. The beta.-scale of solvent hydrogen-bond acceptor (HBA) basicities. *Journal of the American Chemical Society* 98, 377-383.

29. Laurence, C., Gal, J.-F., *Lewis basicity and affinity scales: data and measurement*. John Wiley & Sons: 2009.
